**S1 Table. Correlations between perception and paranormal experiences for the primed group only.** The Pearson's ( $r$ ) and Spearman's Rho ( $r_s$ ) correlations between the percentage of yes responses in each stimulus condition and SAE responses for primed participants.

| Primed          | SAE No Responses       | Anomalous Responses    | Paranormal Responses    |
|-----------------|------------------------|------------------------|-------------------------|
| Degraded Speech | $r = -.279, p = .135$  | $r = .001, p = .994$   | $r_s = .294, p = .114$  |
| Human Speech    | $r_s = .193, p = .307$ | $r_s = .061, p = .748$ | $r_s = -.144, p = .448$ |
| EVP             | $r = -.167, p = .377$  | $r = .197, p = .298$   | $r_s = -.122, p = .521$ |
| Noise           | $r_s = .052, p = .783$ | $r_s = .075, p = .693$ | $r_s = -.064, p = .738$ |
